# Supplementary material
Source: PubMed Central journal article supplement (PMC7269857)
Supplement: NIHMS1578075-supplement-3.pdf [file NIHMS1578075-supplement-3.pdf]

## Supplementary Figure S2

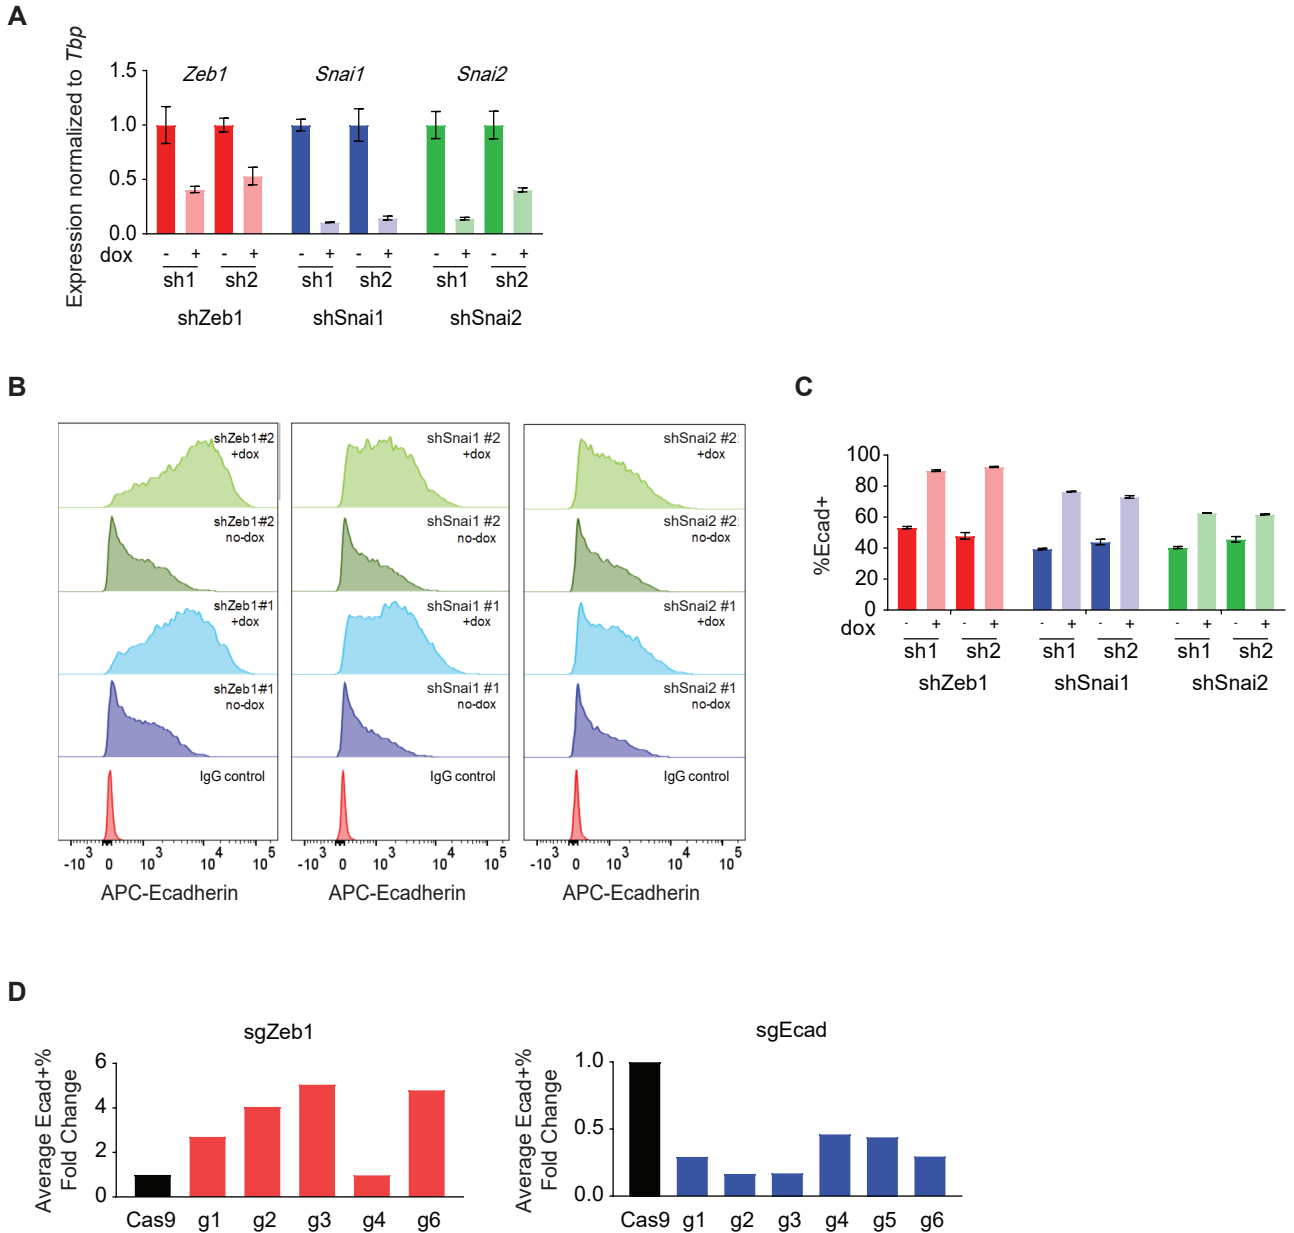

### Supplementary Figure S2. Identifying EMT-TFs as controls for screen.

(A) Knockdown efficiencies of dox-inducible shRNAs targeting *Zeb1*, *Snai1*, and *Snai2* in cell line 3077 c4 were determined by qPCR analysis ( $n = 3$ , mean  $\pm$  SEM). Two shRNAs were tested per gene.

(B-C) Representative flow histograms (B) and quantification (C) of Ecad<sup>+</sup> cells in 3077 c4 expressing the indicated dox-inducible shRNAs ( $n = 3$ , mean  $\pm$  SEM). IgG was used to determine Ecad<sup>-</sup> and Ecad<sup>+</sup> gates.

(D) Quantification of Ecad<sup>+</sup>% fold change of sgRNAs targeting *Zeb1* and *Ecad*.
