# Supplementary material
Source: PubMed Central journal article supplement (PMC7269857)
Supplement: NIHMS1578075-supplement-6.pdf [file NIHMS1578075-supplement-6.pdf]

## Supplementary Figure S5

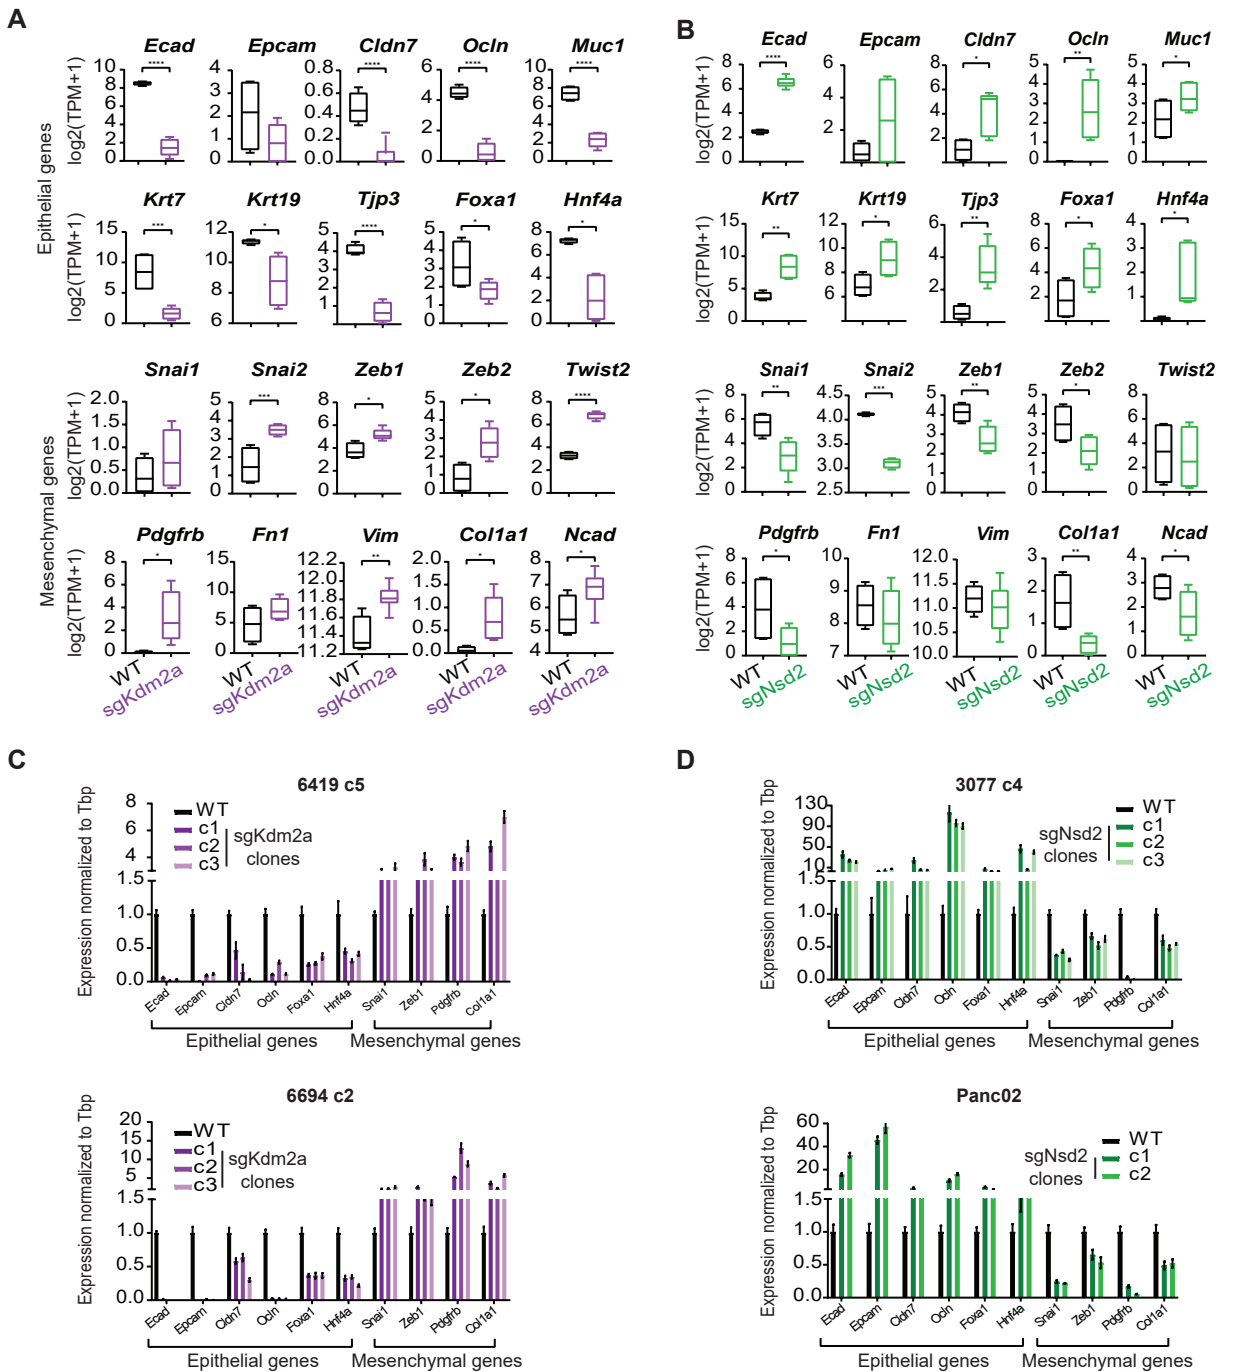

### Supplementary Figure S5. EMT-related genes are reciprocally regulated by *Nsd2* and *Kdm2a*.

(A-B) Boxplots of expressions of various epithelial (top) and mesenchymal (bottom) genes in transcripts per million (TPM) in WT versus sgKdm2a cells (A), as well as in WT versus sgNsd2 cells (B).

(C-D) Relative mRNA expression of epithelial and mesenchymal genes (qPCR) in WT versus sgKdm2a cells (C) and WT versus sgNsd2 cells (D). For all experiments, n=2 cell lines/genotype, n=2-3 sgRNA clones/cell line. For triplicate qPCR analyses, bars represent mean  $\pm$  SEM.
