# Supplementary material
Source: PubMed Central journal article supplement (PMC7269857)
Supplement: NIHMS1578075-supplement-8.pdf [file NIHMS1578075-supplement-8.pdf]

## Supplementary Figure S7

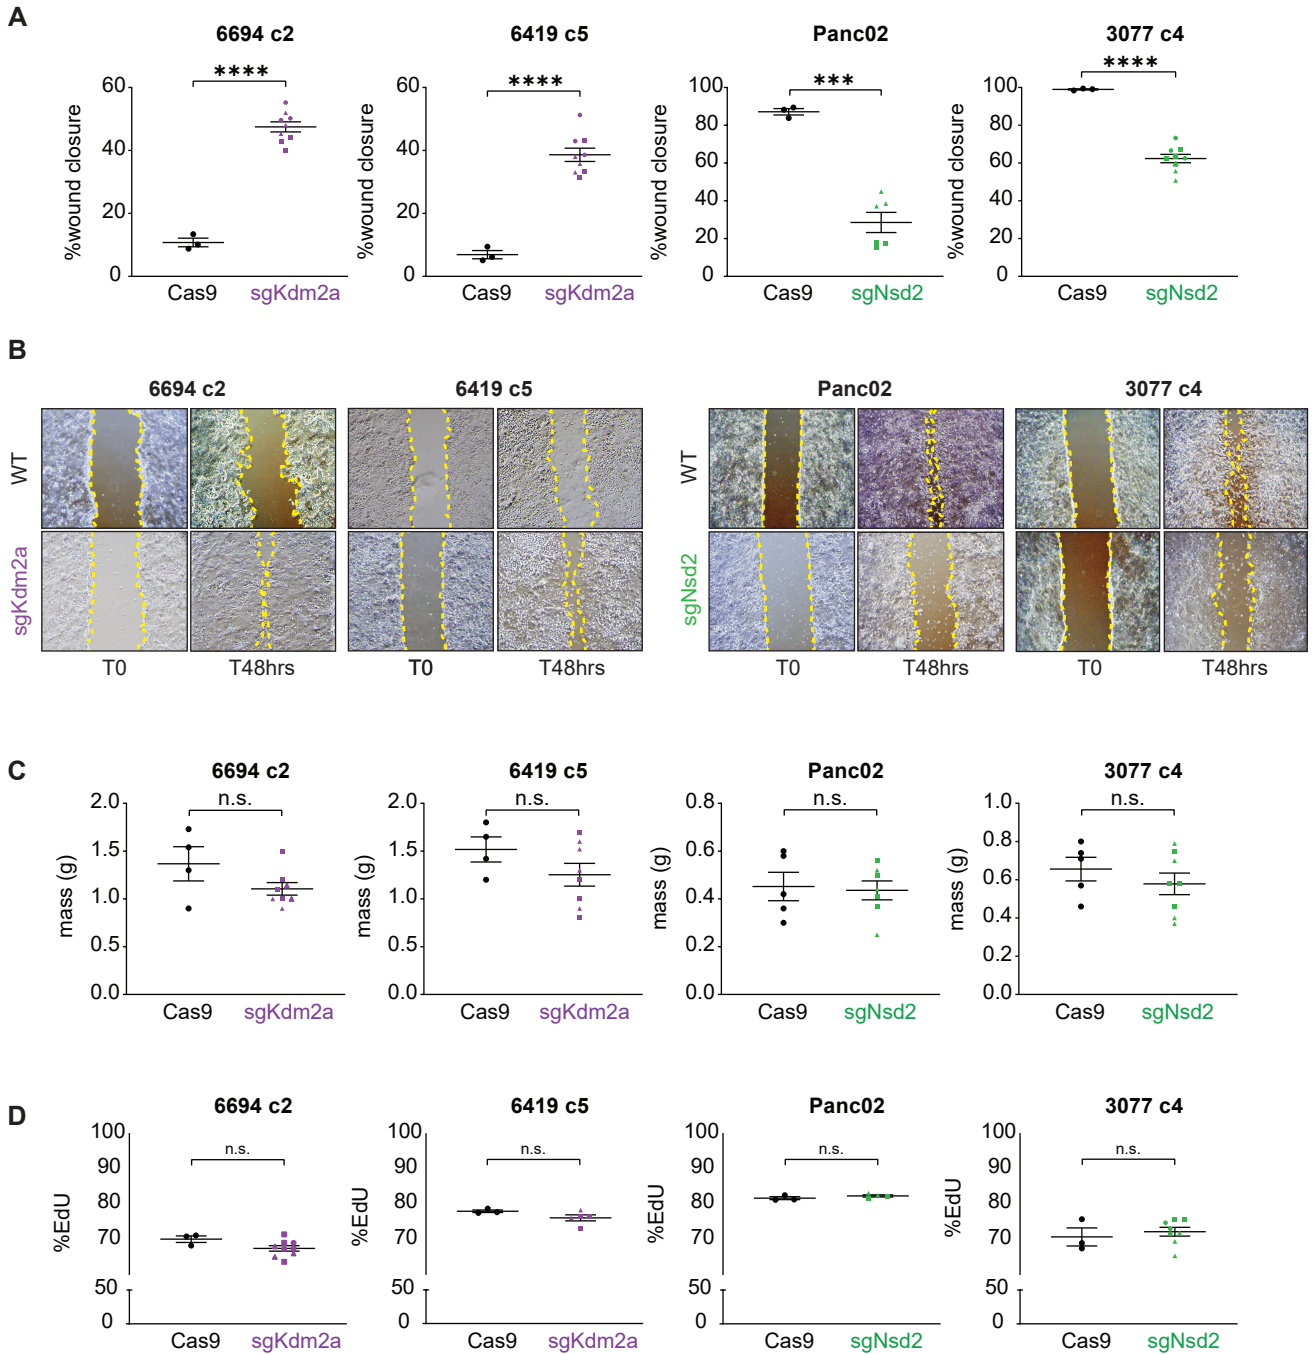

### Supplementary Figure S7. Effects of loss of *Nsd2* and *Kdm2a* on tumor progression.

(A) Quantification of wound closure 48 hours post-scratch.

(B) Representative images of scratch assays. Dotted yellow lines highlight the boundaries of each scratch.

(C) Mass of orthotopic tumors 4 weeks after implantation.

(D) Quantification of EdU staining 2 hours post-EdU pulse in vitro.

Each symbol represents a single mouse (A) or experimental replicate (B, C); square=c1, triangle=c2, circle=c3. Statistical differences were determined by students' t-test.
