# Supplementary material
Source: PubMed Central journal article supplement (PMC7269857)
Supplement: NIHMS1578075-supplement-11.pdf [file NIHMS1578075-supplement-11.pdf]

## Supplementary Figure S10

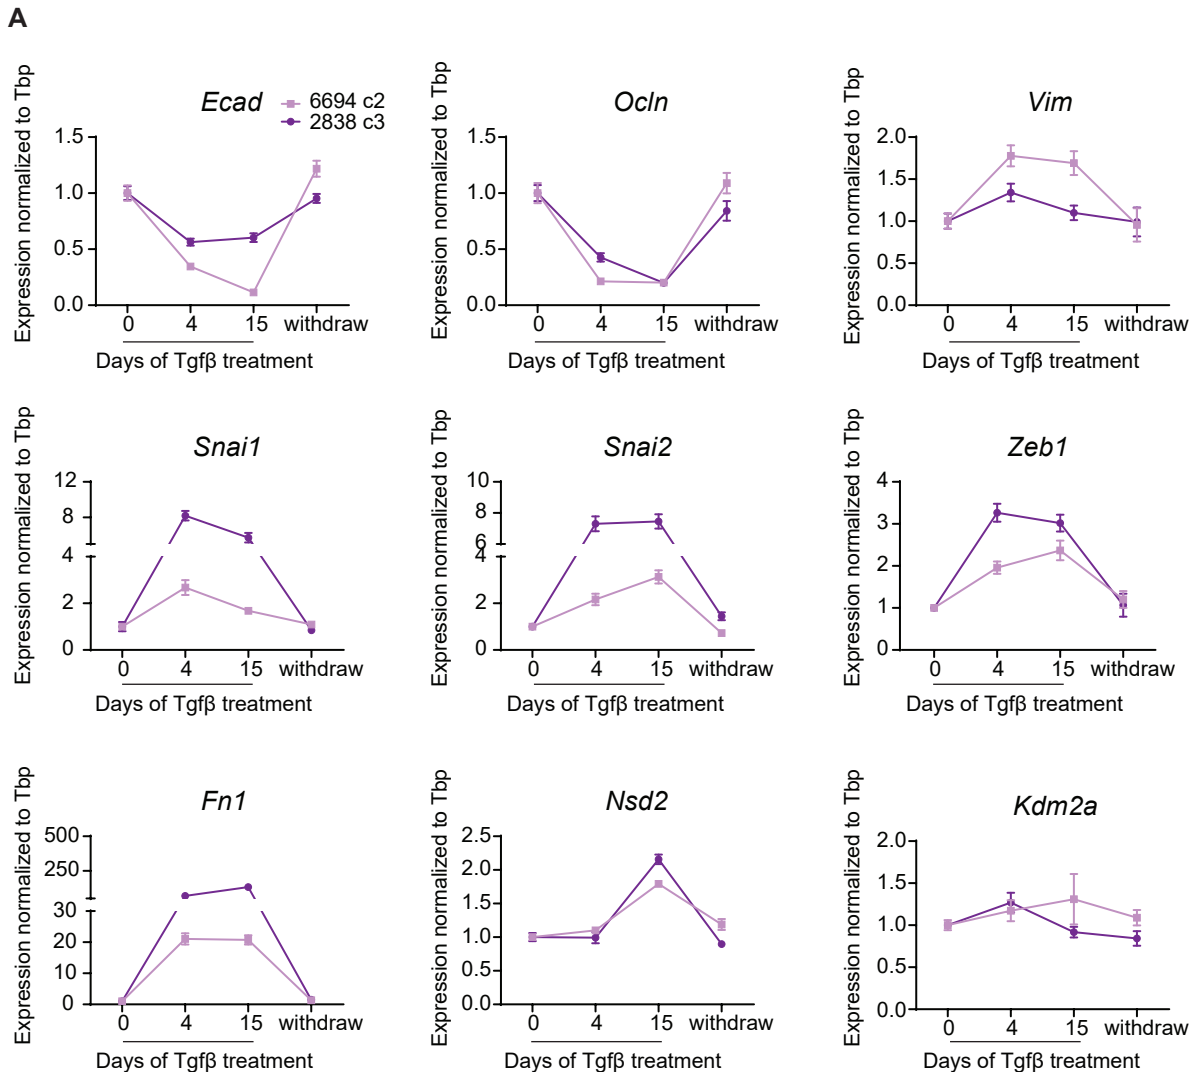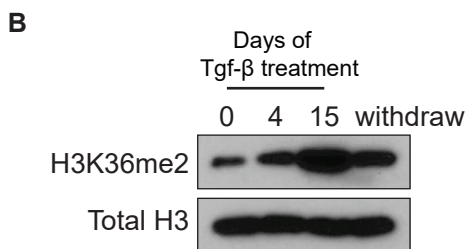

**Supplementary Figure S10. Tgf- $\beta$ -induced transcriptional and epigenetic changes are reversible.** (A) Relative mRNA expression of epithelial, mesenchymal, and epigenetic genes determined by qPCR in 2 cell lines treated with Tgf- $\beta$  for 0, 4, and 15 days, followed by withdrawal of Tgf- $\beta$  for 15 days. Error bars indicate SEM.

(B) Western blot of acid-extracted histones from a cell line treated with Tgf- $\beta$  for 0, 4, and 15 days, followed by withdrawal of Tgf- $\beta$  for 15 days.
