# Supplementary material
Source: PubMed Central journal article supplement (PMC7269857)
Supplement: NIHMS1578075-supplement-13.pdf [file NIHMS1578075-supplement-13.pdf]

Supplementary Figure S12

A

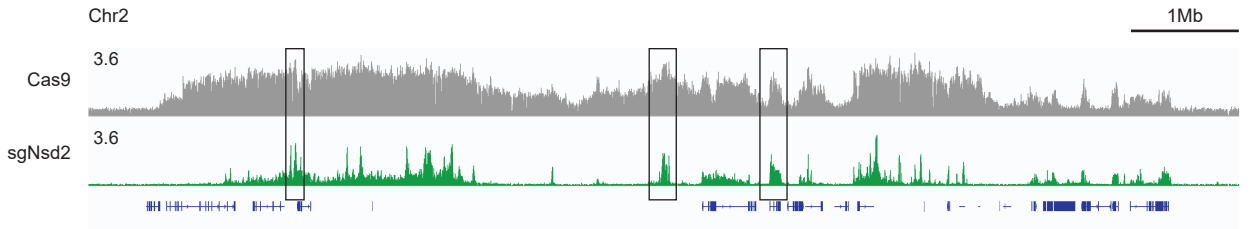

B

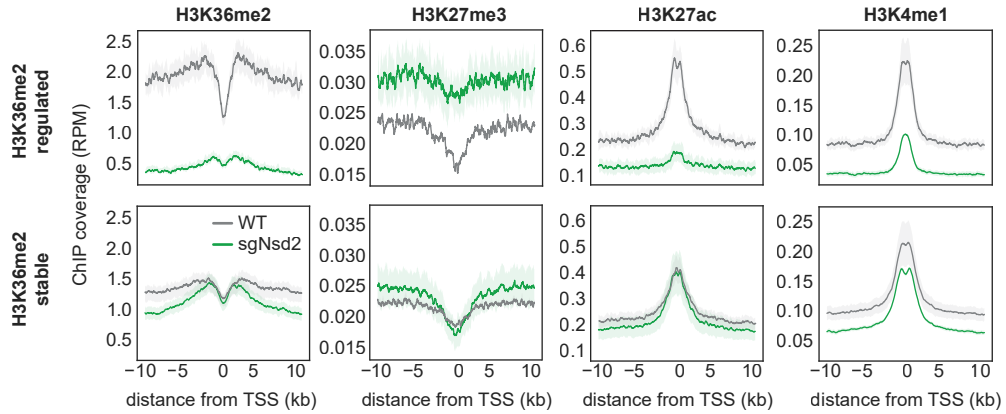

C

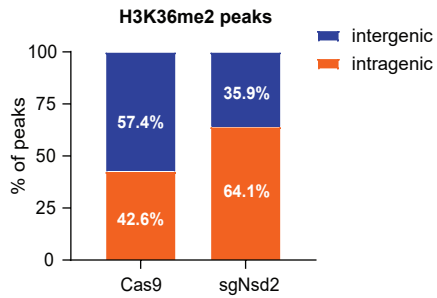

E

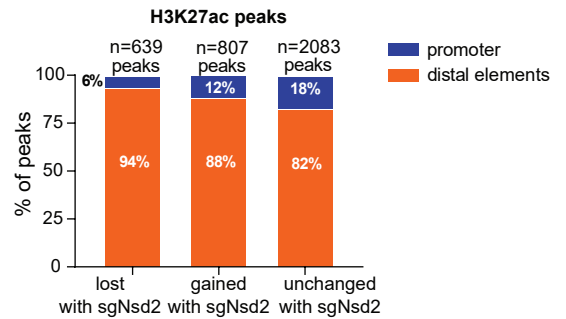

D

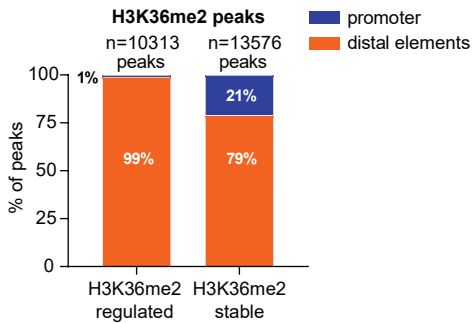

F

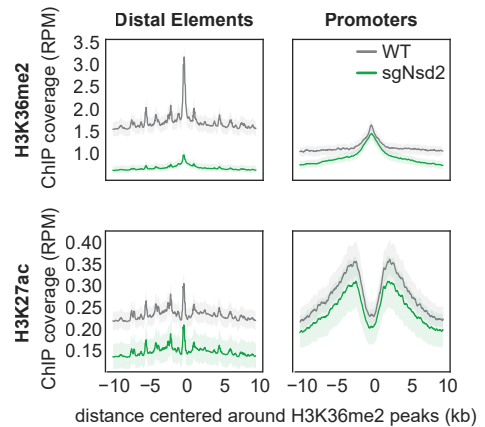

**Supplementary Figure S12. Loss of H3K36me2 is associated with loss of distal H3K27ac.**

**(A)** Representative H3K36me2 ChIP-seq tracks of WT (grey) and sgNsd2 (green) samples over a segment of chromosome 2. Examples of regions where H3K36me2 signal is relatively unaffected with sgNsd2 are framed by solid boxes.

**(B)** Aggregate plots comparing the average ChIP signal of the indicated histone marks in WT (grey) and sgNsd2 (green) samples centered around gene transcription start sites (TSS).

**(C)** Genomic distribution of all H3K36me2 peaks in WT Cas9 and sgNsd2 cells.

**(D)** Distribution of H3K36me2 peaks that are lost with sgNsd2 (H3K36me2-regulated) and those that are not lost with sgNsd2 (H3K36me2-stable) in putative promoter regions (within +/- 2.5kb of TSS, blue) and distal elements (more than +/- 2.5kb outside of TSS, orange).

**(E)** Distribution of H3K27ac peaks that are lost with sgNsd2, gained with sgNsd2, or unchanged in putative promoter regions (blue) and distal elements (orange).

**(F)** Aggregate plots comparing the average H3K36me2 (top) and H3K27ac (bottom) ChIP signal in WT (grey) and sgNsd2 (green) samples over putative promoters (within +/- 2.5kb of TSS, right) and distal elements (more than +/- 2.5kb outside of TSS, left).
